# Supplementary material for: A prospective national precision medicine trial comparing blood and tissue profiling in patients with Cancer of Unknown Primary (CUPCOMP)
Source: Research Square preprint supplement (doi:10.21203/rs.3.rs-6862916/v1), 2025-06-30
Supplement: Supplementary file 1 [file ecb606f655956027746a34aa.xlsx]

## Sheet: Supp. 1
Supplementary Table 1: Reasons for tissue profiling failure (n=42)
		n=
Inadequate sampling		12
	Absence of tissue	6
	Samples not meeting the specimen criteria	6
Sample not acquired		7
	Failure of site to send sample (n=4)	4
	Samples received outside of the testing window	3
Sample test failure		23

## Sheet: Supp. 2
Supplementary Table 2: Suspected diagnosis, treatment groups and treatment outcomes per patient
Patient ID	Confirmed site as per CRF	Suspected site as per CRF	Suspected by MTB	Treatment details	Molecular target identified by MTB in real time	Treatment given for target	Moelcular target detail	Actionable target found in blood, tissue or both	Treatment naiive	Final Group	Explanation for final group - treatment following consent to trial
CUP1010001	iCCA	N/A		Cisplatin and Gemcitabine; Cisplatin and Gemcitabine; Pemigatinib	Yes	Yes	FGFR2-AHCYL1 fusion	Blood	Y	3	Primary site confirmed (intrahepatic cholangiocarcinoma)- site directed SOC (pemigatinib)
CUP1010002	N/A	N/A		Radiotherapy in isolation	Yes	No	h-TMB (Blood=11)	Blood	Y	2	BSC - RT in isolation
CUP1010003	iCCA	N/A	iCCA	Cisplatin and Gemcitabine; pemigatinib	Yes	Yes	FGFR2 - BICC fusion	Both	Y	3	Clinical trial participation - CisGem followed by pemigatinib
CUP1010004	iCCA	N/A	iCCA	Cisplatin and Gemcitabine	Yes	No	FGFR2 - N/A fusion	Both	Y	1	SOC - CisGem
CUP1010005	N/A	Breast		5FU and Epirubicin and Cyclophosphamide and Docetaxel; Capecitabine; Carboplatin and Etoposide; Paclitaxel; Carboplatin and Gemcitabine; Carboplatin and Paclitaxel all prior to consent	Yes	No	CCNE1 amp	Blood	N	2	No systemic therapy after consent
CUP1010006	N/A	N/A		No systemic therapy	Yes	No	Multiple variants	Both	Y	2	No systemic therapy
CUP1010007	iCCA	N/A	iCCA	Cisplatin and Gemcitabine; 5-FU, Folinic Acid and Oxaliplatin (OxMdg/FOLFOX); 5FU, Folinic Acid and Irinotecan (FOLFIRI)	Yes	No	Molecular features in keeping with suspected primary; MYC amp; CDKN1B variant	Blood	Y	3	Second line site directed SOC therapy for intrahepatic cholangiocarcinoma (chemotherapy)
CUP1010008	SkinSCC	N/A		Cemiplimab	Yes	Yes	h-TMB (Tissue=57; blood=6), ATM variant; molecular features in keeping with suspected primary	Both	Y	3	Site directed therapy SOC (cemiplimab) - SCC of skin
CUP1010009	N/A	iCCA		Capecitabine and Oxaliplatin; Epirubicin and Oxaliplatin and Capecitabine before consent. Cisplatin and Gemcitabine; FOLFIRI after consent.	Yes	No	FGFR - TACC2 fusion; Molecular features in keeping with suspected primary	Both	N	3	Site directed therapy SOC with CisGem and FOLFIRI for intrahepatic cholangiocarcinoma
CUP1010010	N/A	N/A		Cisplatin and Gemcitabine; Carboplatin and Etoposide prior to consent.	No	--	--	--	N	2	No treatment post consent
CUP1010011	N/A	N/A		Carboplatin and Paclitaxel	Yes	No	CHEK2 (only in blood) and MAP2K1 variant	Both*	Y	1	SOC chemotherapy
CUP1010012	N/A	Adenexal OR Breast		No systemic therapy	No	--	--	--	Y	2	No systemic therapy
CUP1010013	N/A	N/A		Carboplatin and Paclitaxel; Gemcitabine prior to consent	Yes	No	ATM variant (only in blood) and h-TMB (Tissue=19; Blood=18)	Both*	N	2	No treatment post consent
CUP1010014	N/A	N/A		No systemic therapy	Yes	No	NF2, FBXW7 and MUTYH variants	Blood	Y	2	No systemic therapy
CUP1010015	N/A	N/A		Pembrolizumab	Yes	No	PIK3CA variant	Blood	Y	3	Clinical trial participation - Pembrolizumab
CUP1010016	N/A	N/A		Carboplatin and Paclitaxel prior to consent. Pembrolizumab after consent.	Yes	Yes	h-TMB (Blood=20)	Blood	N	3	Precision med after consent (pembrolizumab)
CUP1010017	N/A	N/A	iCCA	Carboplatin; Capecitabine and Oxaliplatin prior to consent	Yes	No	FGFR2 - N/A fusion	Blood	N	2	No treatment post consent
CUP1010018	N/A	Lung		No systemic therapy	Yes	No	h-TMB (Tissue=27, Blood=1)	Tissue	Y	2	No systemic therapy
CUP1010019	Multiple myeloma	N/A		No systemic therapy	No	--	--	--	Y	2	Radiotherapy in isolation
CUP1010020	N/A	N/A		Had carboplatin/paclitaxel followed by atezolizumab	No	--	--	--	Y	3	Phase II RCT entry (atezolizumab)
CUP1010021	N/A	RCC		No systemic therapy	Yes	No	ATM variant	Blood	N	2	No systemic therapy
CUP1010022	N/A	N/A		Carboplatin and Paclitaxel; Carboplatin and Gemcitabine prior to consent. Atezolizumab after consent.	Yes	Yes	h-TMB (Tissue=7, Blood=18); PIK3CA and BRCA variant	Both*	N	3	Precision med after consent (atezolizumab)
CUP1010023	N/A	N/A		Lost to follow-up: EXCLUDE	No	LTFU	LTFU	LTFU	LTFU	EXCLUDE	LTFU
CUP1010024	N/A	Peritoneum		Carboplatin and paclitaxel; pembrolizumab	No	--	--	--	Y	3	Phase II RCT entry (pembrolizumab)
CUP1010025	N/A	Gynaecological		Carboplatin and Paclitaxel; Carboplatin and Gemcitabine prior to consent.	Yes	No	FGFR2 amp	Blood	N	2	No treatment post consent
CUP1010026	N/A	Anal OR gential SCC OR Skin SCC		Capecitabine and Mitomycin before consent. Carboplatin and paclitaxel after consent.	No	--	--	--	N	1	SOC chemotherapy
CUP1010027	Lung SCC	N/A		Atezolizumab	No	--	--	--	Y	3	Precision med after consent (atezolizumab)
CUP1010028	N/A	Melanoma		Carboplatin and Paclitaxel before consent. Vemurafenib and Cobimetinib after consent	Yes	Yes	BRAF V600E; h-TMB (Tissue=11; Blood=11)	Both	N	3	Phase II RCT - (BRAF V600E targeted therapy)
CUP1010029	N/A	N/A		Carboplatin and Paclitaxel; Atezolizumab before consent. Cisplatin and Gemcitabine after consent.	No	--	--	--	N	1	Precision med prior to consent. SOC chemotherapy after consent
CUP1010030	N/A	Sarcoma OR GI		No systemic therapy	No	--	--	--	Y	2	No systemic therapy
CUP1010031	N/A	N/A		5-FU, Folinic Acid and Oxaliplatin (OxMdg/FOLFOX) prior to consent.	No	--	--	--	N	2	No systemic therapy after consent
CUP1010032	N/A	N/A		No systemic therapy	No	--	--	--	Y	2	No systemic threrapy
CUP1010033	N/A	N/A	Lung	Carboplatin and Paclitaxel	Yes	No	KRAS G12C; molecular features in keeping with suspected primary	Both	Y	1	SOC chemotherapy
CUP1010034	N/A	Pancreas		Carboplatin and Paclitaxel	Yes - retrospective	No	KRAS G12D	Both	Y	1	SOC chemotherapy
CUP1010035	N/A	N/A		Lost to follow-up: EXCLUDE	Yes	LTFU	h-TMB (Blood=16)	Blood	LTFU	EXCLUDE	LTFU
CUP1010036	N/A	N/A		Carboplatin and Paclitaxel	Yes	No	Multiple alterations (PIK3CA, BRCA2 and ERBB2 variants) and h-TMB (Blood=19)	Blood	Y	1	SOC after consent
CUP1010037	N/A	N/A		No systemic therapy	Yes	No	PTEN variant	Blood	Y	2	No systemic therapy
CUP1010038	N/A	N/A		No systemic therapy	Yes	No	KRAS G12D	Blood	Y	2	No systemic therapy
CUP1010039	N/A	N/A		No systemic therapy	Yes	No	h-TMB (Tissue=39; Blood=38)	Both	Y	2	BSC - RT in isolation
CUP1010040	N/A	N/A		Carboplatin and Paclitaxel; Oxaliplatin	Yes	No	PIK3CA and ATM variant	Blood	Y	1	SOC after consent
CUP1010041	N/A	N/A		No systemic therapy	No	--	--	--	Y	2	No systemic therapy
CUP1010042	N/A	N/A		No systemic therapy	Yes	No	GNAS variant (blood); RAF1 rearrangement (tissue)	Both*	Y	2	No systemic therapy
CUP1010043	N/A	N/A		Paclitaxel	Yes	No	PIK3CA variant and ERBB2 amp	Both	Y	1	SOC chemotherapy
CUP1010044	N/A	N/A		Carboplatin and Paclitaxel	Yes	No	FGFR1 amp	Blood	Y	1	SOC chemotherapy
CUP1010045	N/A	N/A		Paclitaxel	No	--	--	--	Y	1	SOC chemotherapy
CUP1110002	N/A	N/A	Lower GI	Capecitabine	Yes	No	Molecular features in keeping with suspected primary; BRAF non-V600E variant	Blood	Y	1	SOC chemotherapy
CUP1110003	N/A	N/A		Carboplatin and Paclitaxel	Yes	No	ATR variant	Blood	Y	1	SOC chemotherapy
CUP1110004	N/A	Lower GI	Lower GI	Capecitabine and Oxaliplatin	Yes	No	RNF43 and BRAF V600E variants; Molecular features in keeping with suspected primary	Both	Y	1	SOC chemotherapy
CUP1110005	N/A	N/A		Capecitabine and Oxaliplatin	Yes	No	ARID1A (both) and ATM (blood) variant	Both*	Y	1	SOC chemotherapy
CUP1110006	N/A	N/A		Atezolizumab	Yes	Yes	h-TMB (Blood=33)	Blood	Y	3	Precision med after consent (atezolizumab)
CUP1110007	N/A	Adenocarcinoma somatic transform of prev germ cell		Etoposide prior to consent. Capecitabine and Oxaliplatin after consent.	Yes - retrospective	No	EGFR variant	Tissue	N	1	SOC chemotherapy
CUP1110008	N/A	Lower GI	Lower GI	Oxaliplatin prior to consent. Capecitabine and Oxaliplatin after consent.	No	--	Molecular features in keeping with suspected primary	Blood	N	3	Precision med for gastro/colorectal primary after consent
CUP1110009	N/A	Lower GI	Lower GI	Pembrolizumab	Yes	Yes	MSI-H and variant in MLH1 gene and BRAF V600E; h-TMB (Blood=44); molecular features in keeping with suspected primary	Blood	Y	3	Precision med after consent (pembrolizumab)
CUP1110010	N/A	Breast		Paclitaxel, Abraxane	Yes	No	PIK3CA variant	Blood	Y	1	SOC chemotherapy
CUP1110011	Pancreas	N/A		5FU, Folinic Acid and Oxaliplatin and Irinotecan (FOLFIRINOX); Trastuzumab; Paclitaxel	Yes	Yes	ERBB2 amplification	Both	Y	3	Primary site directed treatment after consent
CUP1110012	N/A	N/A		Paclitaxel; Carboplatin; Carboplatin and Paclitaxel; Liposomal Doxorubicin (Caelyx)	No	--	--	--	Y	1	SOC chemotherapy
CUP1110013	N/A	N/A		Capecitabine	Not performed	--	--	--	Y	1	SOC chemotherapy
CUP1110014	N/A	N/A	Lung	Carboplatin; Paclitaxel; Carboplatin and Paclitaxel; Atezolizumab	Yes	Yes	h-TMB (Blood=33, Tissue=1); molecular features in keeping with suspected primary	Blood	Y	3	Precision med after consent (atezolizumab)
CUP1110015	N/A	Lower GI		Oxaliplatin; 5-FU, Folinic Acid and Oxaliplatin (OxMdg/FOLFOX)	No	--	--	--	Y	3	Precision med after consent (colorectal suspected)
CUP1210001	N/A	N/A		Capecitabine and Oxaliplatin	No	--	--	--	Y	1	SOC chemotherapy
CUP1210002	N/A	N/A		No systemic therapy	Yes	No	BRAF K601E variant	Both	Y	2	No systemic therapy
CUP1210003	N/A	Upper GI		Epirubicin and Cisplatin and Capecitabine; Capecitabine; Paclitaxel; Carboplatin and Paclitaxel; Cisplatin and Capecitabine; Capecitabine; Paclitaxel before consent. Carboplatin and Gemcitabine; Atezolizumab after consent	Yes	Yes	Multiple variants (CHEK2; ATR); h-TMB (Blood=14)	Blood	N	3	Precision med after consent (atezolizumab)
CUP1210004	N/A	N/A		No systemic therapy, radiotherapy alone	Not performed	--	--	--	Y	2	No systemic therapy
CUP1210005	N/A	N/A		No systemic therapy. CR to groin resection.	Yes	No	h-TMB (Tissue=11, Blood=0)	Tissue	Y	EXCLUDE for treatment survival	Radically treated
CUP1210006	N/A	Lower GI		Capecitabine and OxaliplatinIrinotecan5-FU, Folinic Acid and Oxaliplatin (OxMdg/FOLFOX) + EGFR antagonist before consent. CapecitabineRegorafenib after consent	Yes	No	ATM variant	Both	N	3	Precision med after consent (capecitabine and regorafenib)
CUP1210008	N/A	Peritoneal	Small bowel	R-CHOP5-FU, Folinic Acid and Oxaliplatin (OxMdg/FOLFOX) prior to consent. Paclitaxel after consent.	No	--	Molecular features in keeping with suspected primary	Both	N	1	SOC chemotherapy
CUP1210009	N/A	N/A	iCCA	No systemic therapy	Yes	No	Molecular features in keeping with suspected primary; FGFR2 variant; BAP1 rearrangemnt	Blood	Y	2	No systemic therapy
CUP1210010	N/A	N/A		Capecitabine and Oxaliplatin	No	--	--	--	Y	1	SOC chemotherapy
CUP1210011	N/A	N/A		No systemic therapy	No	--	--	--	Y	2	No systemic therapy
CUP1210012	N/A	N/A		No systemic therapy	No	--	--	--	Y	2	No systemic therapy
CUP1210013	Breast	N/A		Ribociclib + Letrozole	Yes	No	h-TMB (Blood=14, Tissue=1)	Blood	Y	3	Precision med after consent (ribociclib and letrozole)
CUP1210014	RCC	N/A		Ipilimumab and Nivolumab	No	--	--	--	Y	3	Precision med after consent (ipi nivo)
CUP1310001	N/A	Renal Cell Carcinoma	RCC	Carboplatin and Paclitaxel; Nivolumab; Cabozantanib	Yes	No	Molecular features in keeping with suspected primary; NF2 variant	Both	Y	3	Precision med after consent (nivo/cabozantinib)
CUP1310003	N/A	N/A		No systemic therapy	Yes	No	PTEN variant	Blood	Y	2	No systemic therapy
CUP1310004	N/A	N/A		Carboplatin and Paclitaxel	Yes	No	PIK3CA variant	Blood	Y	1	SOC chemotherapy
CUP1310005	N/A	N/A		Carboplatin and Etoposide	No	--	--	--		EXCLUDE for treatment survival	NEC
CUP1310006	N/A	N/A		Carboplatin and Etoposide; Carboplatin and Etoposide prior to consent. Atezolizumab after consent.	Yes	Yes	h-TMB (Tissue=21; Blood=20)	Both	N	3	Precision med after consent (atezolizumab)
CUP1310007	N/A	N/A		Carboplatin and Paclitaxel; Atezolizumab prior to consent.	Yes	No	h-TMB (Tissue=5; Blood=52)	Blood	N	2	No systemic therapy after consent
CUP1310008	N/A	Lung		Carboplatin and Paclitaxel; Atezolizumab	No	--	--	--	Y	3	Precision med after consent (atezolizumab)
CUP1310009	N/A	Bile duct OR Breast OR Gynaecological	iCCA	Carboplatin and Gemcitabine;Oxaliplatin	Yes	No	Multiple variants (ATM; PTEN; ARID1A)	Both	Y	1	SOC chemotherapy
CUP1310010	N/A	N/A		Carboplatin and Etoposide prior to consent. Carboplatin and Etoposide after consent.	No	--	--	--	N	EXCLUDE for treatment survival	NEC
CUP1410001	N/A	N/A		Cisplatin and Gemcitabine; Cisplatin and Gemcitabine; Futibatinib prior to consent. Carboplatin and Paclitaxel after consent.	Yes	No	FGFR2 - N/A fusion and variant	Blood	N	1	SOC chemotherapy
CUP1410002	N/A	N/A		Cisplatin and Gemcitabine; Carboplatin and Gemcitabine; Carboplatin and Paclitaxel and Atezolizumab; Atezolizumab before consent. Paclitaxel after consent	Yes	No	h-TMB (WGS=14; Blood=14)	Both	N	1	Precision med prior to consent. SOC after consent
CUP1410003	N/A	N/A		No systemic therapy	No	--	--	--	Y	2	No systemic therapy
CUP1410004	N/A	N/A		Cisplatin and Gemcitabine; Cisplatin and Gemcitabine and Atezolizumab; Atezolizumab prior to consent. Paclitaxel after consent.	No	--	--	--	N	1	Precision med prior to consent. SOC after consent
CUP1410005	N/A	N/A		Cisplatin and Gemcitabine; Cisplatin and Gemcitabine and Atezolizumab; Atezolizumab prior to consent. Paclitaxel after consent.	No	--	--	--	N	1	Precision med prior to consent. SOC after consent
CUP1410006	N/A	N/A		WITHDRAWN	Yes - retrospective	WITHDRAWN	PIK3CA mutation	Blood	WITHDRAWN	EXCLUDE	WITHDRAWN
CUP1410007	N/A	N/A		Carboplatin and Paclitaxel prior to consent. Pembrolizumab; Pembrolizumab; Carboplatin and Gemcitabine after consent.	Yes	Yes	h-TMB (WGS=14.06; Blood=14)	Both	N	3	Precision med after consent (pembrolizumab)
CUP7010001	N/A	Lower GI		5-FU, Folinic Acid and Oxaliplatin (OxMdg/FOLFOX) + EGFR antagonist; 5FU, Folinic Acid and Irinotecan (FOLFIRI) + EGFR antagonist	No	--	--	--	Y	3	Precision med after consent
CUP7010002	N/A	N/A		Carboplatin and Paclitaxel; Carboplatin and Paclitaxel prior to consent.	No	--	--	--	N	2	No systemic treatment after consent
CUP7010003	N/A	Salivary gland		Carboplatin and Paclitaxel	No	--	--	--	Y	1	SOC chemotherapy
CUP7010004	N/A	N/A		Cisplatin and Etoposide	No	--	--	--	Y	1	SOC chemotherapy
CUP7010005	N/A	N/A		Capecitabine and Oxaliplatin	No	--	--	--	Y	1	SOC chemotherapy
CUP7010006	N/A	N/A		No systemic therapy	No	--	--	--	Y	2	No systemic therapy
CUP7010007	Lower GI	N/A		Carboplatin and Paclitaxel prior to consent. 5-FU, Folinic Acid and Oxaliplatin (OxMdg/FOLFOX)5-FU; Folinic Acid and Oxaliplatin (OxMdg/FOLFOX) after consent.	Yes	No	Multiple variants (PTEN, CHEK2, ATM, KRAS G12D variants)	Both	N	3	Precision med after consent (FOLFOX for colorectal primary)
CUP7010008	N/A	N/A		Carboplatin and Paclitaxel prior to consent	Yes	No	BRCA - ARHGEF4 fusion	Both	N	2	No systemic therapy after consent
CUP7010009	Sarcoma	N/A		No systemic therapy	No	--	--	--	Y	2	No systemic therapy
CUP7010010	N/A	N/A		Capecitabine and Oxaliplatin	No	--	--	--	Y	1	SOC chemotherapy
CUP7010012	N/A	N/A		Capecitabine and Oxaliplatin; Capecitabine prior to consent.	Yes	No	ERBB3 variant; FGFR3 rearrangement	Blood	N	2	No systemic therapy after consent
CUP8010001	N/A	N/A		Capecitabine and Oxaliplatin prior to consent	Yes	No	ESR1 variant	Blood	N	2	No systemic therapy after consent
CUP8010003	N/A	N/A		No systemic therapy	Yes	No	Multiple variants (KRAS G12D)	Both	Y	2	No systemic therapy
CUP8010004	N/A	N/A		Carboplatin and Paclitaxel; Paclitaxel; Carboplatin and Paclitaxel before consent.	Yes	No	CHEK2 variant	Blood	N	2	No systemic therapy after consent
CUP8010005	N/A	N/A		Carboplatin and Paclitaxel	Yes	No	h-TMB (Blood=24)	Blood	Y	1	SOC chemotherapy
CUP8010006	N/A	N/A		Carboplatin and Gemcitabine prior to consent. Paclitaxel; Pembrolizumab after consent.	Yes	Yes	h-TMB (Blood=27)	Blood	N	3	Precision med after consent (pembrolizumab)
CUP8010007	N/A	N/A		Carboplatin and Paclitaxel	Yes	No	EGFR and RAF1 amp	Both	Y	1	SOC chemotherapy
CUP8010008	N/A	N/A		Carboplatin and Paclitaxel	Yes	No	h-TMB (Tissue = 10, Blood =0)	Tissue	Y	1	SOC chemotherapy
CUP8010009	N/A	N/A		No systemic therapy	Yes	No	KRAS G12C variant	Both	Y	2	No systemic therapy
CUP8010010	N/A	N/A		Capecitabine; Oxaliplatin before consent. MRK-ATR Trial - ART inhibitor (Phase 1 trial) after consent.	Yes	Yes	TP53 Y220C and BRCA2 variant; h-TMB (Tissue=16, Blood=5)	Both	N	3	Precision med after consent (MRK-ATR trial - ART inhibitor)
CUP8010012	N/A	N/A		Carboplatin and Paclitaxel	No	--	--	--	Y	1	SOC chemotherapy
CUP8010013	N/A	N/A		Carboplatin and Paclitaxel	Yes	No	MSI- High, h-TMB (Blood = 28)	Blood	Y	1	SOC chemotherapy
CUP8010014	N/A	N/A		Cisplatin before consent. Carboplatin and Paclitaxel; Pembrolizumab after consent.	Yes	Yes	h-TMB (Blood=14)	Blood	N	3	Precision med after consent (pembrolizumab)
CUP8010015	N/A	N/A		Carboplatin and Paclitaxel	No - retrospective	--	--	--	Y	1	SOC chemotherapy
CUP8010016	N/A	N/A		No systemic therapy	No	--	--	--	Y	2	No systemic therapy
CUP8010017	N/A	N/A		5-FU prior to consent. Carboplatin and Paclitaxel after consent.	Yes	No	BRCA2 variant	Both	N	1	SOC chemotherapy
CUP8010018	N/A	N/A		No systemic therapy	No	--	--	--	Y	2	No systemic therapy
CUP8010019	N/A	N/A		Carboplatin and Paclitaxel	No	LTFU	LTFU	LTFU	LTFU	EXCLUDE	LTFU
CUP8010021	N/A	N/A		Carboplatin and Paclitaxel	Yes	No	PIK3CA variant	Blood	Y	1	SOC chemotherapy

## Sheet: Supp.3
Supplementary Table 3: Baseline characteristics by treatment group
Baseline Characteristics	Treatment Group			P-value2,3
	Group 1	Group 2	Group 3
	N = 401	N = 391	N = 311
Age at consent	62 (13)	64 (14)	61 (12)	0.5*
Gender				0.3**
Female	21 / 40 (53%)	26 / 39 (67%)	15 / 31 (48%)
Male	19 / 40 (48%)	13 / 39 (33%)	16 / 31 (52%)
Ethnicity				0.4†
Any other Asian background	1 / 40 (2.5%)	0 / 39 (0%)	0 / 31 (0%)
Any other white background	4 / 40 (10%)	2 / 39 (5.1%)	2 / 31 (6.5%)
British	27 / 40 (68%)	34 / 39 (87%)	26 / 31 (84%)
Chinese	0 / 40 (0%)	1 / 39 (2.6%)	0 / 31 (0%)
Missing	1 / 40 (2.5%)	0 / 39 (0%)	0 / 31 (0%)
Unknown	7 / 40 (18%)	2 / 39 (5.1%)	3 / 31 (9.7%)
Cellularity of tissue				0.13†
Adenocarcinoma	26 / 40 (65%)	15 / 39 (38%)	20 / 31 (65%)
Carcinoma	6 / 40 (15%)	14 / 39 (36%)	7 / 31 (23%)
Other	0 / 40 (0%)	2 / 39 (5.1%)	0 / 31 (0%)
Squamous Carcinoma	6 / 40 (15%)	7 / 39 (18%)	4 / 31 (13%)
Unknown	2 / 40 (5.0%)	1 / 39 (2.6%)	0 / 31 (0%)
Degree of differentiation				0.3†
Missing	3 / 40 (7.5%)	2 / 39 (5.1%)	0 / 31 (0%)
Moderate	4 / 40 (10%)	2 / 39 (5.1%)	3 / 31 (9.7%)
Not specified	12 / 40 (30%)	17 / 39 (44%)	16 / 31 (52%)
Poor	19 / 40 (48%)	16 / 39 (41%)	10 / 31 (32%)
Undifferentiated	0 / 40 (0%)	0 / 39 (0%)	2 / 31 (6.5%)
Well	2 / 40 (5.0%)	2 / 39 (5.1%)	0 / 31 (0%)
Mean number of metastatic sites	2.90 (1.48)	3.49 (2.42)	2.84 (1.75)	0.6*
Number of metastatic sites				0.6**
1	6 / 40 (15%)	9 / 39 (23%)	8 / 31 (26%)
2	12 / 40 (30%)	7 / 39 (18%)	6 / 31 (19%)
3	11 / 40 (28%)	8 / 39 (21%)	9 / 31 (29%)
4+	11 / 40 (28%)	15 / 39 (38%)	8 / 31 (26%)
Bone metastases present	10 / 40 (25%)	12 / 39 (31%)	9 / 31 (29%)	0.8**
Lymph node metastases present	26 / 40 (65%)	17 / 39 (44%)	21 / 31 (68%)	0.069**
Liver metastases present	8 / 36 (22%)	14 / 35 (40%)	7 / 29 (24%)	0.2**
Mean number of comorbidities	2.55 (2.48)	2.64 (2.06)	2.61 (2.17)	0.9*
Weight loss in last 6 months?				0.8†
Missing	5 / 40 (13%)	2 / 39 (5.1%)	2 / 31 (6.5%)
No	25 / 40 (63%)	25 / 39 (64%)	20 / 31 (65%)
Yes	10 / 40 (25%)	12 / 39 (31%)	9 / 31 (29%)
ECOG PS				0.019†
0	14 / 40 (35%)	7 / 39 (18%)	12 / 31 (39%)
1	21 / 40 (53%)	20 / 39 (51%)	16 / 31 (52%)
2	5 / 40 (13%)	11 / 39 (28%)	1 / 31 (3.2%)
3	0 / 40 (0%)	1 / 39 (2.6%)	0 / 31 (0%)
Unknown	0 / 40 (0%)	0 / 39 (0%)	2 / 31 (6.5%)
Smoking Status				0.081†
Current	6 / 40 (15%)	7 / 39 (18%)	6 / 31 (19%)
Missing	1 / 40 (2.5%)	0 / 39 (0%)	0 / 31 (0%)
Never	18 / 40 (45%)	28 / 39 (72%)	16 / 31 (52%)
Past	13 / 40 (33%)	4 / 39 (10%)	9 / 31 (29%)
Unknown	2 / 40 (5.0%)	0 / 39 (0%)	0 / 31 (0%)
Family history of cancer				0.3**
N	8 / 25 (32%)	15 / 30 (50%)	6 / 19 (32%)
Y	17 / 25 (68%)	15 / 30 (50%)	13 / 19 (68%)
CTFS	0.14 (0.18)	0.16 (0.25)	0.17 (0.21)	0.6*
SIPS score
0	20 / 40 (50%)	19 / 39 (49%)	22 / 31 (71%)	0.147†
1	12 / 40 (30%)	15 / 39 (38%)	5 / 31 (16%)
2	4 / 40 (10%)	1 / 39 (3%)	3 / 31 (10%)
Unknown	4 / 40 (10%)	4 / 39 (10%)	1 / 31 (3%)
1 Mean (SD); n / N (%)
2 Kruskal-Wallis rank sum test* ; Pearson’s Chi-squared test**; Fisher’s exact test†
3 Fisher's exact test used for categorical variables where > 20% of expected cell counts are less than 5; Chi-square test used for others.

## Sheet: Supp.  4
Supplementary Table 4: Baseline characteristics by Comprehensive Tumour Fraction Score (CTFS)
Baseline Characteristics	CTFS Group		P-value2,3
	<1%	≥1%
	N = 401	N = 691
Age at consent	63 (13)	61 (13)	0.4**
Gender			0.8*
Female	22 / 40 (55%)	41 / 69 (59%)
Male	18 / 40 (45%)	28 / 69 (41%)
Ethnicity			0.031†
African	0 / 40 (0%)	1 / 69 (1.4%)
Any other Asian background	0 / 40 (0%)	1 / 69 (1.4%)
Any other white background	3 / 40 (7.5%)	4 / 69 (5.8%)
British	34 / 40 (85%)	50 / 69 (72%)
Chinese	1 / 40 (2.5%)	0 / 69 (0%)
Missing	1 / 40 (2.5%)	0 / 69 (0%)
Unknown	1 / 40 (2.5%)	13 / 69 (19%)
Cellularity of tissue			0.3†
Adenocarcinoma	25 / 40 (63%)	32 / 69 (46%)
Carcinoma	8 / 40 (20%)	20 / 69 (29%)
Other	0 / 40 (0%)	3 / 69 (4.3%)
Squamous Carcinoma	7 / 40 (18%)	11 / 69 (16%)
Unknown	0 / 40 (0%)	3 / 69 (4.3%)
Degree of differentiation			0.057†
Missing	0 / 40 (0%)	4 / 69 (5.8%)
Moderate	3 / 40 (7.5%)	6 / 69 (8.7%)
Not specified	23 / 40 (58%)	20 / 69 (29%)
Poor	13 / 40 (33%)	34 / 69 (49%)
Undifferentiated	0 / 40 (0%)	2 / 69 (2.9%)
Well	1 / 40 (2.5%)	3 / 69 (4.3%)
Number of metastatic sites	2.60 (1.65)	3.41 (2.16)	0.031*
Bone metastases present	6 / 40 (15%)	26 / 69 (38%)	0.022*
Liver metastases present	4 / 40 (10%)	25 / 69 (36%)	0.003*
Lymph node metastases present	21 / 40 (53%)	42 / 69 (61%)	0.4*
Number of comorbidities	2.45 (2.37)	2.51 (2.00)	0.9**
Number of concomitant medications	3.4 (3.0)	5.2 (3.8)	0.007**
Weight loss in last 6 months			0.081*
Missing	3 / 40 (7.5%)	5 / 69 (7.2%)
No	30 / 40 (75%)	38 / 69 (55%)
Yes	7 / 40 (18%)	26 / 69 (38%)
ECOG PS			>0.9†
0	14 / 40 (35%)	20 / 69 (29%)
1	20 / 40 (50%)	36 / 69 (52%)
2	5 / 40 (13%)	11 / 69 (16%)
3	0 / 40 (0%)	1 / 69 (1.4%)
Unknown	1 / 40 (2.5%)	1 / 69 (1.4%)
Smoking Status			0.9†
Current	5 / 40 (13%)	12 / 69 (17%)
Missing	0 / 40 (0%)	1 / 69 (1.4%)
Never	25 / 40 (63%)	36 / 69 (52%)
Past	10 / 40 (25%)	19 / 69 (28%)
Unknown	0 / 40 (0%)	1 / 69 (1.4%)
Number of previous systemic therapies			0.012†
0	20 / 40 (50%)	27 / 69 (39%)
1	7 / 40 (18%)	28 / 69 (41%)
2	5 / 40 (13%)	10 / 69 (14%)
3	6 / 40 (15%)	1 / 69 (1.4%)
4	0 / 40 (0%)	1 / 69 (1.4%)
5	2 / 40 (5.0%)	2 / 69 (2.9%)
Number of previous radiotherapeutic interventions			>0.9†
0	30 / 40 (75%)	49 / 69 (71%)
1	8 / 40 (20%)	13 / 69 (19%)
2	2 / 40 (5.0%)	6 / 69 (8.7%)
3	0 / 40 (0%)	1 / 69 (1.4%)
Family history of cancer			0.2*
N	14 / 28 (50%)	16 / 48 (33%)
Y	14 / 28 (50%)	32 / 48 (67%)
CTFS	0.00 (0.00)	0.24 (0.22)	<0.001**
1 n / N (%); Mean (SD)
2 Pearson’s Chi-squared test*; Welch Two Sample t-test**; Fisher’s exact test†
3 Fisher's exact test used for categorical variables where > 20% of expected cell counts are less than 5; Chi-square test used for others.
